# Supplementary material for: The De Novo Cytosine Methyltransferase DRM2 Requires Intact UBA Domains and a Catalytically Mutated Paralog DRM3 during RNA–Directed DNA Methylation in Arabidopsis thaliana
Source: PubMed Central journal article supplement (PMC2965745; doi:10.1371/journal.pgen.1001182), 2010-10-28

**MEA-ISR**  
**DRM2-Myc drm1 drm2**

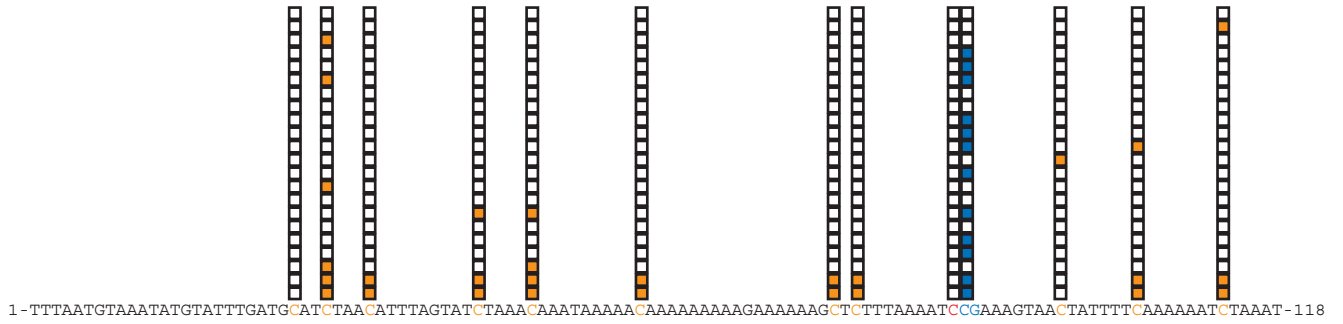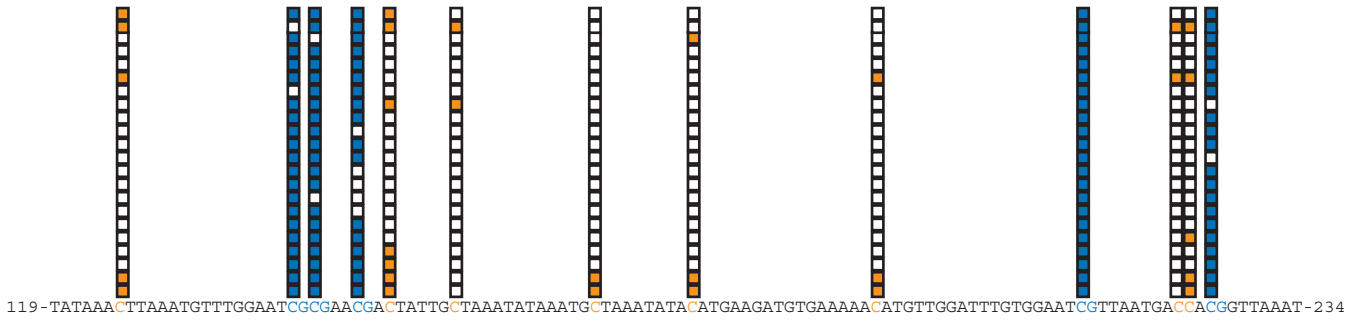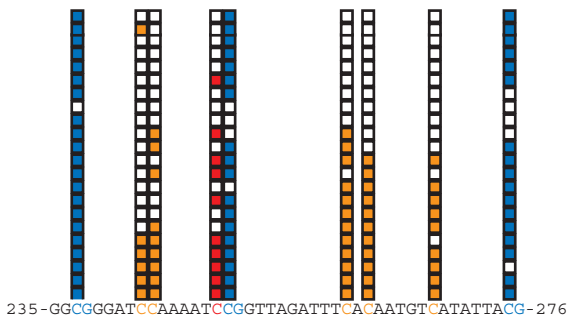

**MEA-ISR**  
**DRM2cat-Myc drm1 drm2**

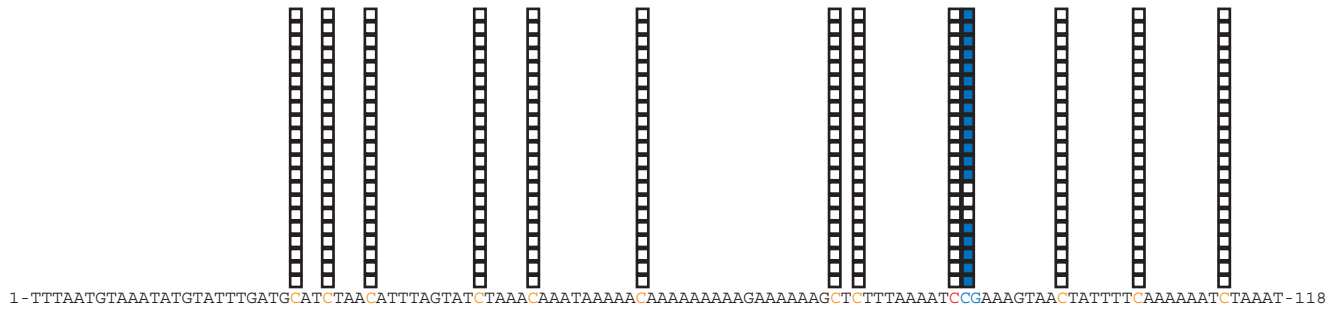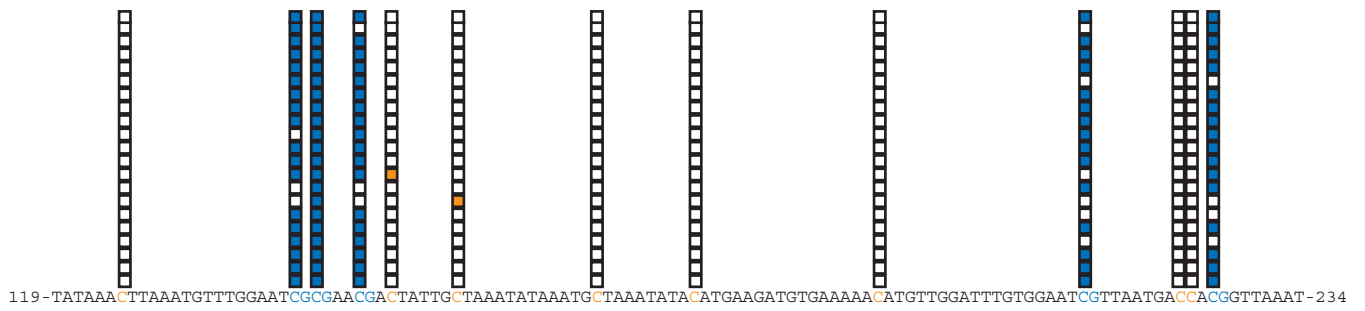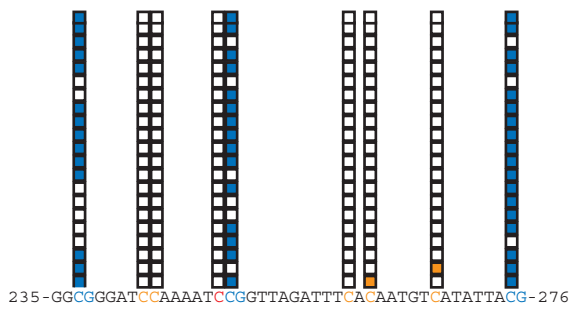

**MEA-ISR**

**DRM2uba-Myc *drm1 drm2***

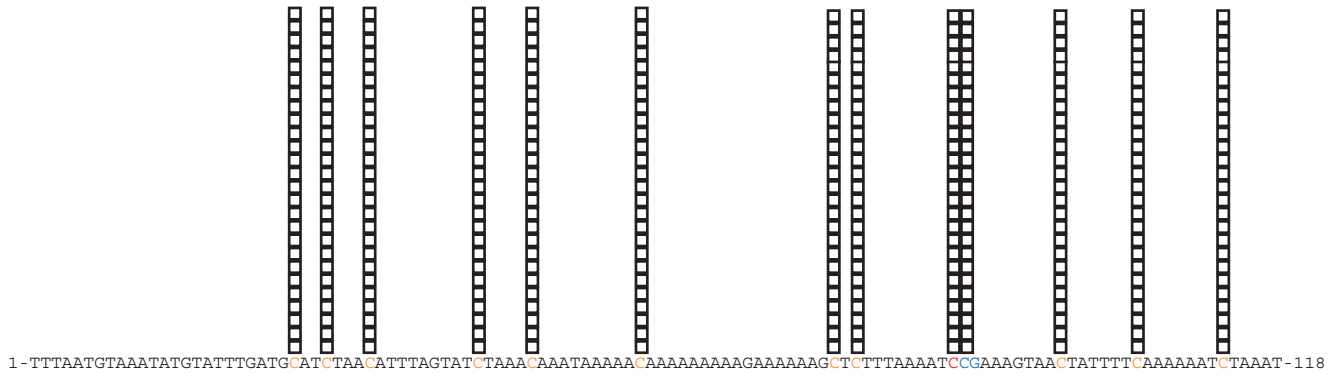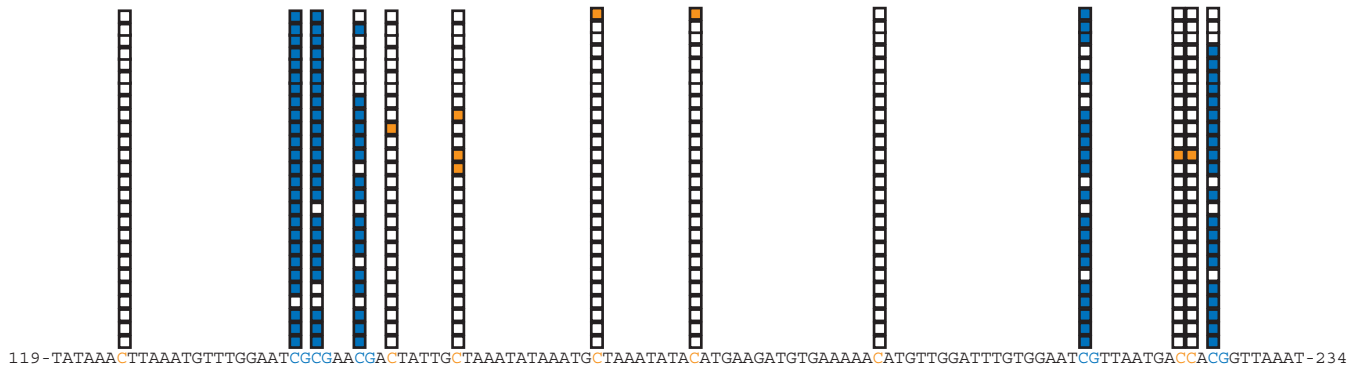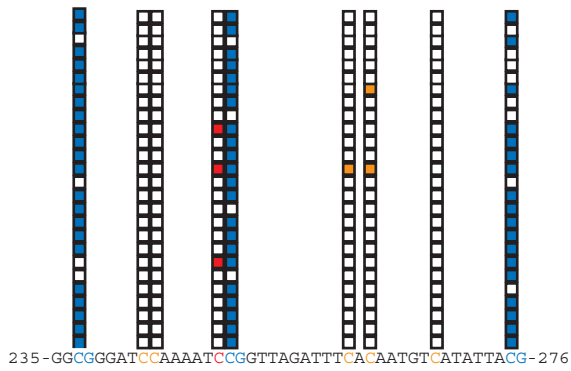

**MEA-ISR**  
**drm3-1**

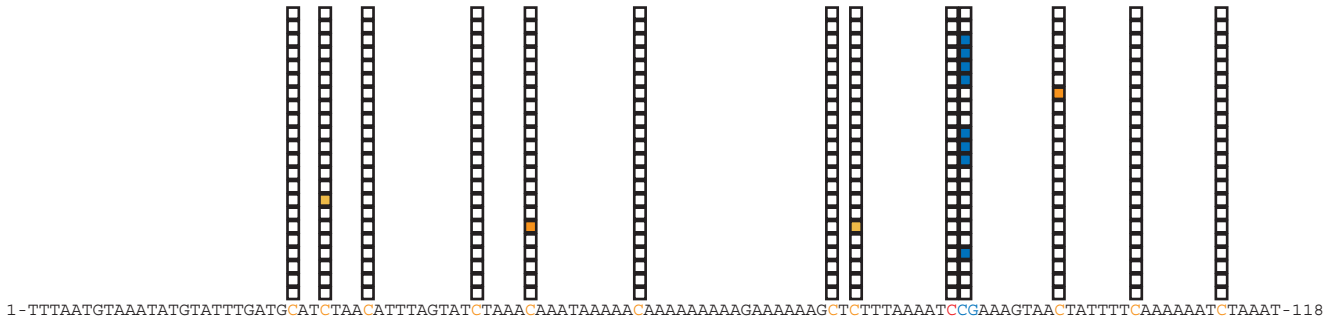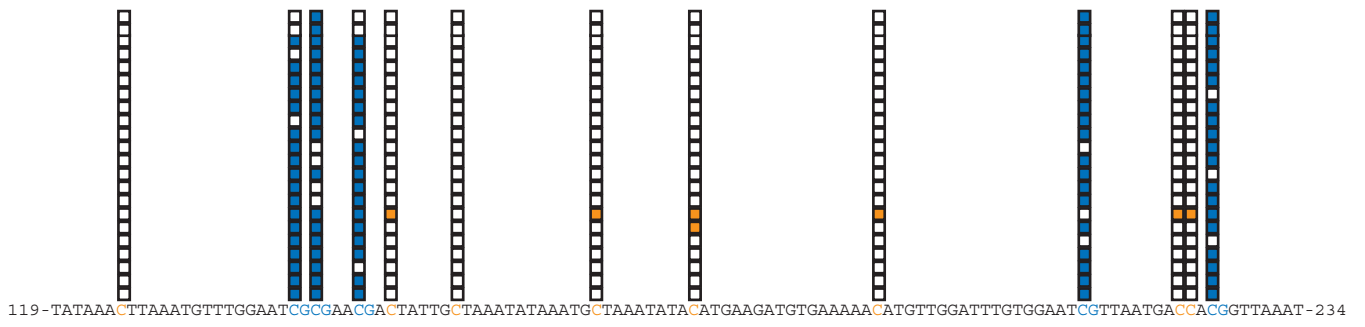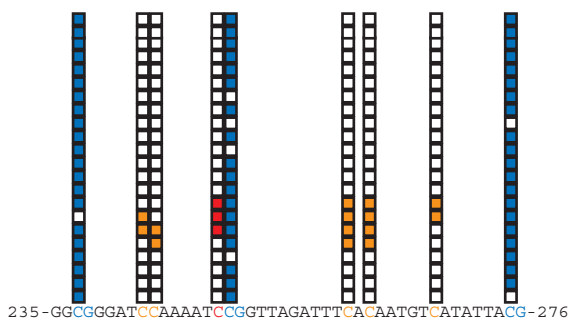

**MEA-ISR**  
**drm1 drm2**

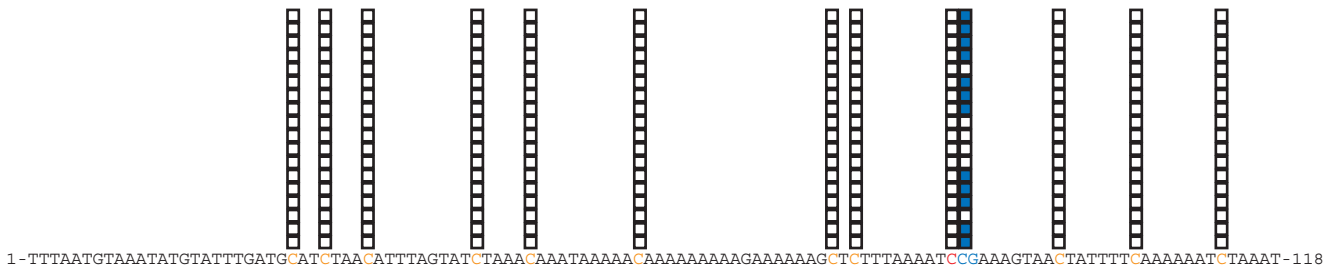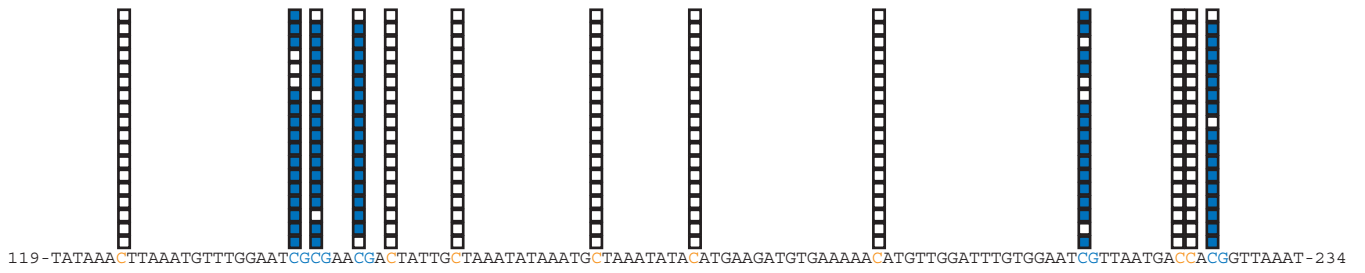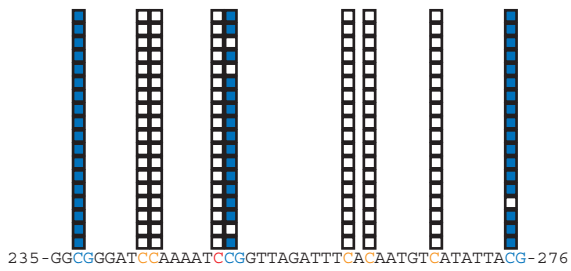



**FWA**  
*drm3-1*

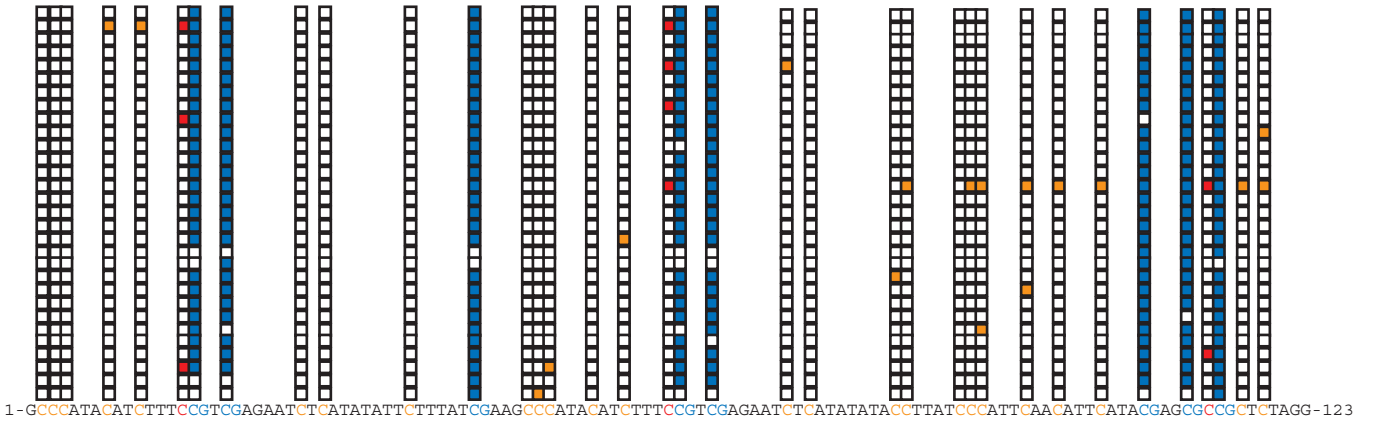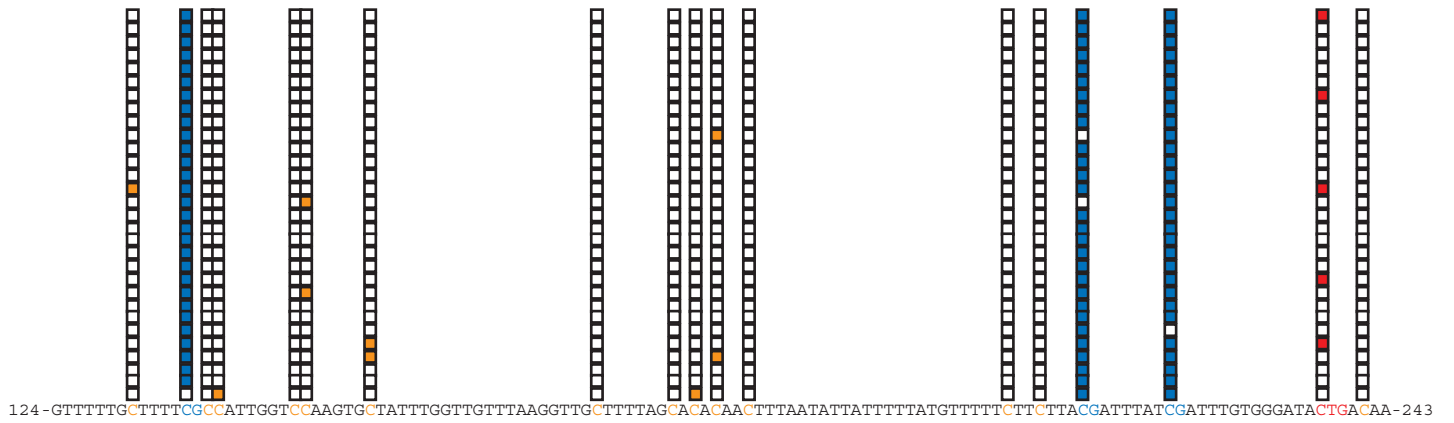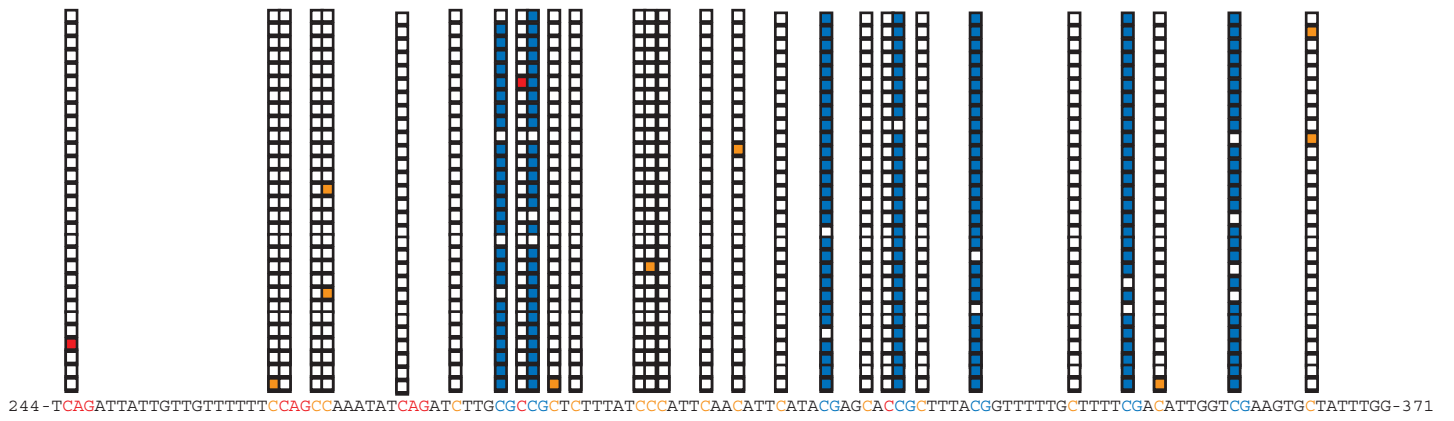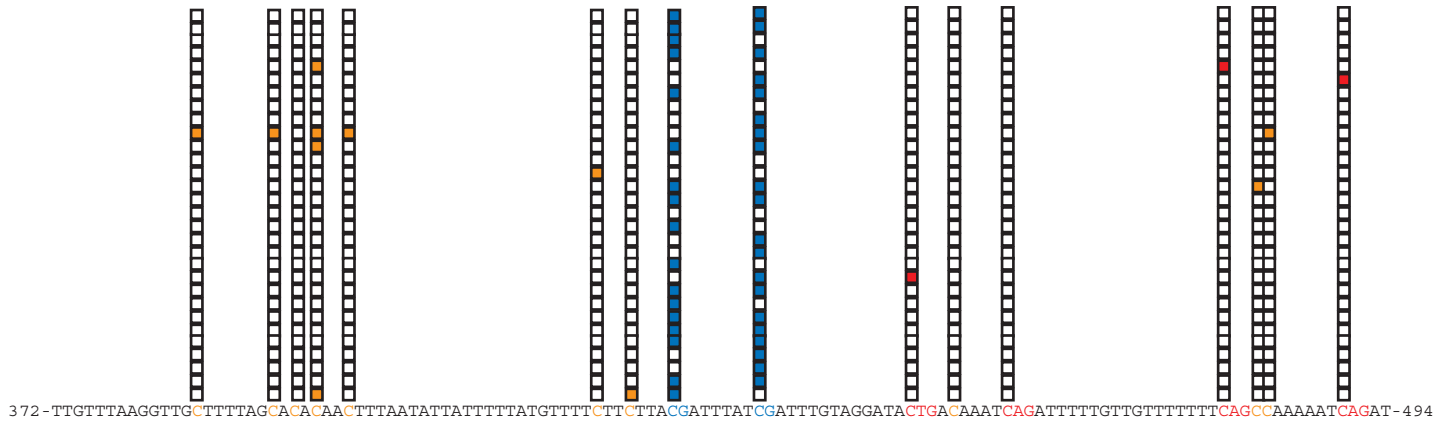



**FWA**  
*drm1 drm2*

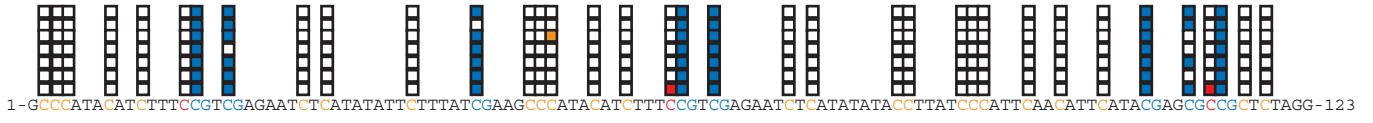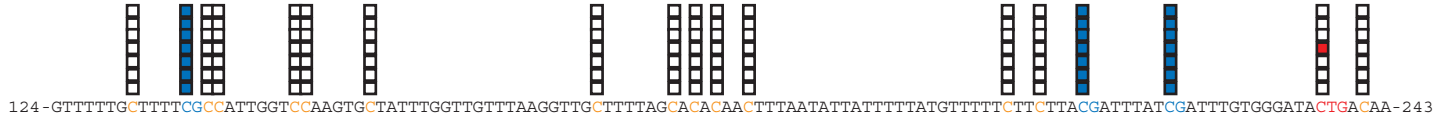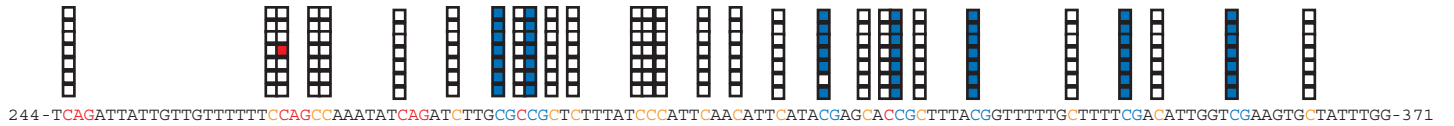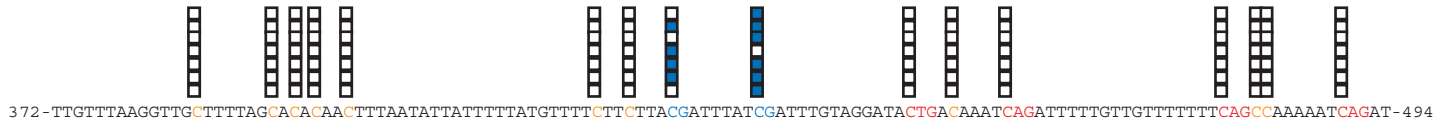

Supplement: pgen.1001182.s003.pdf [file pgen.1001182.s003.pdf]
