# Supplementary material for: The De Novo Cytosine Methyltransferase DRM2 Requires Intact UBA Domains and a Catalytically Mutated Paralog DRM3 during RNA–Directed DNA Methylation in Arabidopsis thaliana
Source: PubMed Central journal article supplement (PMC2965745; doi:10.1371/journal.pgen.1001182), 2010-10-28

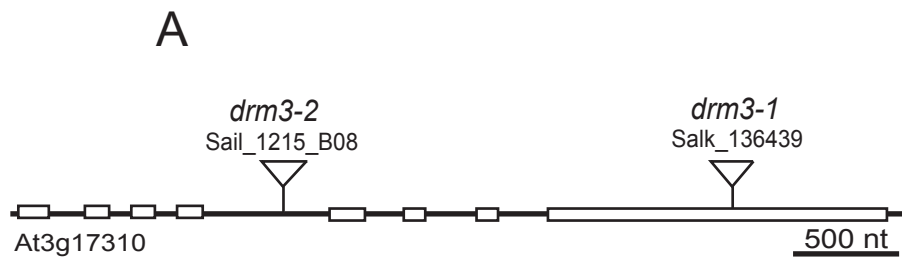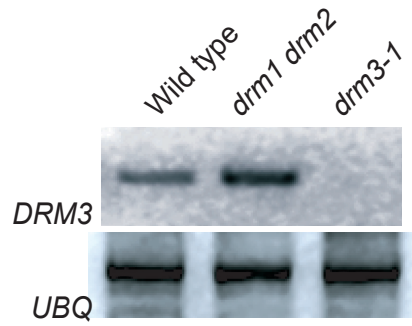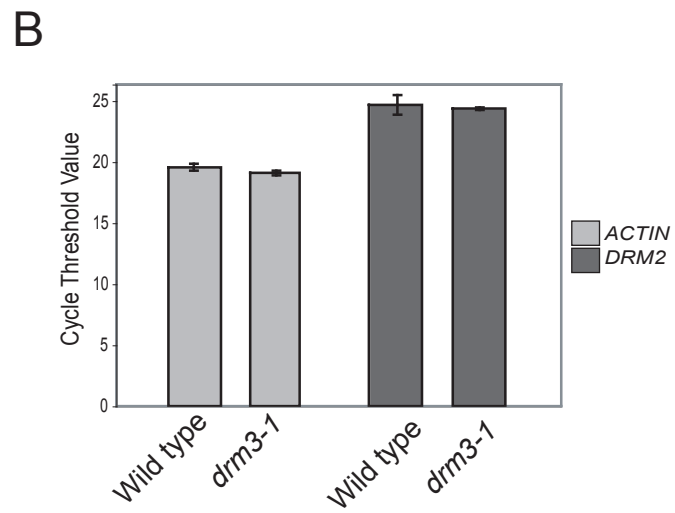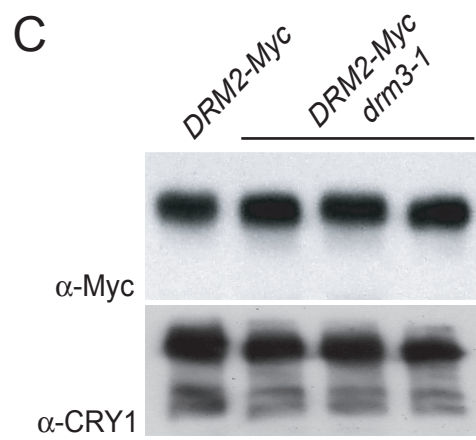

Supplement: pgen.1001182.s001.pdf [file pgen.1001182.s001.pdf]
