# Supplementary material for: The De Novo Cytosine Methyltransferase DRM2 Requires Intact UBA Domains and a Catalytically Mutated Paralog DRM3 during RNA–Directed DNA Methylation in Arabidopsis thaliana
Source: PubMed Central journal article supplement (PMC2965745; doi:10.1371/journal.pgen.1001182), 2010-10-28
Supplement: pgen.1001182.s002.pdf [file pgen.1001182.s002.pdf]

|        |       |                                                              |     |
|--------|-------|--------------------------------------------------------------|-----|
| AtDRM1 | UBA-1 | MMILETLFNYSASTEASSSKSVINHFIAMGFPEEH--VIKAMQEHGDEDVGEITNALLT  | 148 |
| AtDRM2 | UBA-2 | SVIDTISKYSSDCEAGSSKSKAIDHFLAMGFDEEK--VVKAIQEHGEDNMEAIANALLS  | 149 |
| PtDRM2 | UBA-1 | -----SSSAEASSSVGSSSGSKMIDHFVKMGFPEKMKMVAKAIKENEGDADSVLETLLT  | 97  |
| OsDRM2 | UBA-1 | -----LPQDANGKANGSG-ALVAEFMGMGFPKEM--ILKAIKEIGDTEQLELELLT     | 90  |
| AtDRM3 | UBA-1 | SFHGLMEPKPEPDIEYET-DRIRIALLT-MKFPENL--VDFALDRLGKDTPIDEMVDIV  | 156 |
| PtDRM3 | UBA-1 | KYSTVTGVKEEPDVFDEYVDDKRVSLK-MNFPAKE--VELAMDKLGENAPINEIIDFII  | 173 |
| OsDRM3 | UBA-1 | HFAPRKEVIQDIKVEADSSSEKRSYLLSTMNFSQRE--VDLALNQLGEEASLEQLVDFIV | 169 |

|        |       |                                                              |     |
|--------|-------|--------------------------------------------------------------|-----|
| AtDRM1 | UBA-2 | ---LSSDDEEDELNNSNEDRILQALIKMGYLREDAAIATERCGEDASMEEVDFICAAQ   | 232 |
| AtDRM2 | UBA-3 | M--LNSDDEKD--PNSNENSKIRSLVKMGFSELEASLAVERCGENVDIAELTDFLCAAQ  | 235 |
| PtDRM2 | UBA-2 | FSDVDSADDEVITKTVSDENKLAFLRRMGYKEADASIAITRCGTEATISELADFICAAQ  | 187 |
| OsDRM2 | UBA-2 | TPHSDGSGDEDFQEMSEKDEKMKSLVNMGFPEDEAKMAIDRC-LDAPVAVLVDSIYASQ  | 194 |
| AtDRM3 | UBA-2 | -----PEVPNEQLFETMDKTLRLLLEMGFSENDEISMAIEKIGTKGQISVLAESIVTGE  | 243 |
| PtDRM3 | UBA-2 | SWHYDDYYQDVNDETLYGTMDKTLCLLNMGFSENEVSLAIDKFGSEVPVTELANAICAHQ | 280 |
| OsDRM3 | UBA-2 | -----EVKDESLFGVMDKTLHLLQMGFTEEEVSSVIDKAGPEATVLELADTIFARR     | 238 |
